# Supplementary material
Source: HighWire-hosted journal article supplement (https://www.cmajopen.ca/highwire/filestream/84920/field_highwire_adjunct_files/0/2020-0129-1-at.pdf)
Supplement: 2020-0129-1-at.pdf [file 2020-0129-1-at.pdf]

# Appendix 1 (as supplied by the authors)

## Appendix 1A: Search Strategy for Ovid MEDLINE

### MEDLINE (Ovid)

1. exp Infant, Newborn/
2. Infant, Low Birth Weight/
3. Infant, Premature/
4. Infant, Extremely Premature/
5. Intensive Care Units, Neonatal/
6. Intensive Care, Neonatal/
7. (Neonat\* or newborn or NICU or premature or preterm or ((newborn or neonat\*) adj2 (intensive or critical) adj2 (care or unit))))).mp
8. Trinitroglycerin.mp
9. Nitrol.mp
10. Nitroglycerin/
11. Nitroglycerin.mp
12. Glyceryl trinitrate.mp
13. 1 or 2 or 3 or 4 or 5 or 6 or 7



**PICO Format**

(Outline the PICOs for your question — i.e., Patient, Intervention, Comparison, Outcome, and Study Design — as applicable)

|          |                                                                                                                         |
|----------|-------------------------------------------------------------------------------------------------------------------------|
| <b>P</b> | <i>Preterm and term newborn infants in the neonatal intensive care unit with peripheral tissue ischemia</i>             |
| <b>I</b> | <i>Topical nitroglycerin products</i>                                                                                   |
| <b>C</b> | <i>Standard of care or any other therapeutic intervention without the application of topical nitroglycerin products</i> |
| <b>O</b> | <i>Effect on the area of peripheral tissue ischemia</i>                                                                 |
| <b>S</b> | n/a                                                                                                                     |

**Inclusion Criteria**

(List criteria such as age groups, study designs, etc., to be included) *[optional]*

**Exclusion Criteria**

(List criteria such as study designs, date limits, etc., to be excluded) *[optional]*

**Was a search filter applied?**

Yes, *No*

**If YES, which one(s) (e.g., Cochrane RCT filter, PubMed Clinical Queries filter)? Provide the source if this is a published filter.** *[mandatory if YES to previous question — textbox]*

Other notes or comments you feel would be useful for the peer reviewer? *[optional]*

Please copy and paste your search strategy here, exactly as run, including the number of hits per line. *[mandatory]*

|                                 |         |
|---------------------------------|---------|
| Medline (Ovid)                  |         |
| Searches                        | Results |
| Exp Infant, Newborn/            | 611659  |
| Infant, Low Birth Weight/       | 18600   |
| Infant, Premature/              | 54189   |
| Infant, Extremely Premature/    | 2611    |
| Intensive Care Units, Neonatal/ | 14981   |
| Intensive Care, Neonatal/       | 5712    |
| Neonat*.mp                      | 295846  |
| Nitroglycerin/                  | 12299   |
| Nitroglycerin.mp                | 15924   |
| Glyceryl trinitrate.mp          | 2475    |
| 1 or 2 or 3 or 4 or 5 or 6 or 7 | 747670  |
| 8 or 9 or 10                    | 16652   |
| 11 and 12                       | 164     |

**PEER REVIEW ASSESSMENT: THIS SECTION TO BE FILLED IN BY THE REVIEWER**

|                        |                                                                   |                            |
|------------------------|-------------------------------------------------------------------|----------------------------|
| Reviewer: Denise Smith | Email: <a href="mailto:dsmith@mcmaster.ca">dsmith@mcmaster.ca</a> | Date completed: October 19 |
|                        | dsdsmidsmith@mcmaster                                             |                            |

**1. TRANSLATION**

|                            |   |
|----------------------------|---|
| A --No revisions           | X |
| B -- Revision(s) suggested |   |
| C -- Revision(s) required  |   |

If "B" or "C," please provide an explanation or example:

**2. BOOLEAN AND PROXIMITY OPERATORS**

|                             |   |
|-----------------------------|---|
| A ---No revisions           | X |
| B --- Revision(s) suggested |   |
| C --- Revision(s) required  |   |

If “B” or “C,” please provide an explanation or example:

### 3. SUBJECT HEADINGS

|                             |   |
|-----------------------------|---|
| A ---No revisions           |   |
| B --- Revision(s) suggested | X |
| C --- Revision(s) required  |   |

If “B” or “C,” please provide an explanation or example:

1. Lines 2-4 are redundant, remove them. They are accounted for and included in in the search noted on line 1

### 4. TEXT WORD SEARCHING

|                            |   |
|----------------------------|---|
| A ---No revisions          |   |
| B --- Revision(s)suggested |   |
| C --- Revision(s) required | X |

If “B” or “C,” please provide an explanation or example:

1. This search is not comprehensive enough to meet the standard for a systematic review literature search. In order to reach this standard, add the following keyword terms:
  - a. Change line 7 to:  
*(Neonat\* or newborn or NICU or premature or preterm or ((newborn or neonat\*) adj2 (intensive or critical) adj2 (care or unit))).mp.*
  - b. Add a keyword for the trade name of nitroglycerin: *nitrol.mp.*
  - c. Another name for nitroglycerin: *trinitroglyrin.mp.*

### 5. SPELLING, SYNTAX, AND LINE NUMBERS

|                            |   |
|----------------------------|---|
| A ---No revisions          | X |
| B --- Revision(s)suggested |   |
| C --- Revision(s) required |   |

If “B” or “C,” please provide an explanation or example:

### 6. LIMITS AND FILTERS

|                   |   |
|-------------------|---|
| A ---No revisions | X |
|-------------------|---|

|                             |  |
|-----------------------------|--|
| B --- Revision(s) suggested |  |
| C --- Revision(s) required  |  |

If “B” or “C,” please provide an explanation or example:  
No applicable.

**OVERALL EVALUATION (Note: If one or more “revision required” is noted above, the response below must be “revisions required”.)**

|                             |   |
|-----------------------------|---|
| A ---No revisions           |   |
| B --- Revision(s) suggested |   |
| C --- Revision(s) required  | X |

Additional comments:

[Improve the comprehensiveness and rigor of your search strategy by adding the keyword terms noted in section 4. Revisions to subject headings are advised but not required.](#)
